1

2

3 **Non-COVID-19 patients in times of pandemic: decreased emergency department**  
4 **visits and increased out-of-hospital mortality in Northern Italy**

5

6 **Authors:**

7 Luca Santi MD <sup>1</sup>, Davide Golinelli MD <sup>2</sup>, Andrea Tampieri MD <sup>3</sup>, Gabriele Farina MD <sup>1</sup>, Manfredi Greco <sup>2</sup>,  
8 Simona Rosa MSc <sup>2</sup>, Michelle Beleffi MD <sup>4</sup>, Bianca Biavati MD <sup>4</sup>, Francesca Campinoti MD <sup>4</sup>, Stefania  
9 Guerrini MD <sup>1</sup>, Rodolfo Ferrari MD <sup>3</sup>, Paola Rucci, PhD <sup>2</sup>, Maria Pia Fantini MD <sup>2</sup>, Fabrizio Giostra MD <sup>1</sup>.

10 <sup>1</sup> Department of Emergency, Medicina d'Urgenza e Pronto Soccorso, Policlinico S. Orsola-Malpighi,  
11 Bologna, Italy

12 <sup>2</sup> Department of Biomedical and Neuromotor Sciences (DIBINEM), Alma Mater Studiorum - University of  
13 Bologna. Via San Giacomo 12, 40126, Bologna, Italy.

14 <sup>3</sup> Department of Emergency, Medicina d'Urgenza e Pronto Soccorso. Ospedale S. Maria della Scaletta,  
15 Imola, Italy

16 <sup>4</sup> Alma Mater Studiorum - Università di Bologna

17

18

19 **Authors' affiliations:**

20 Luca Santi, MD: Policlinico S. Orsola-Malpighi. Dipartimento dell'Emergenza-Urgenza. Unità operativa di  
21 Medicina d'urgenza e Pronto Soccorso. Via Giuseppe Massarenti, 9, 40138, Bologna, Italy.

22 [lucasanti@hotmail.it](mailto:lucasanti@hotmail.it)

23

24 Davide Golinelli, MD: Dipartimento di Scienze Biomediche e Neuromotorie, Alma Mater Studiorum –  
25 Università di Bologna. Via San Giacomo 12, 40126, Bologna, Italy. [davide.golinelli@unibo.it](mailto:davide.golinelli@unibo.it)

26 ORCID: 0000-0001-7331-9520

27 Andrea Tampieri MD: Ospedale S. Maria della Scaletta. Dipartimento di Emergenza-urgenza e Accettazione.  
28 Unità Operativa di Pronto Soccorso e Medicina d'Urgenza. Viale Amendola, 2 – 40026 Imola, Italy.  
29 [a.tampieri@ausl.imola.bo.it](mailto:a.tampieri@ausl.imola.bo.it)

30

31 Gabriele Farina MD: Policlinico S. Orsola-Malpighi. Dipartimento dell'Emergenza-Urgenza. Unità operativa  
32 di Medicina d'urgenza e Pronto Soccorso. Via Giuseppe Massarenti, 9, 40138, Bologna, Italy.  
33 [gabriele.farina@aosp.bo.it](mailto:gabriele.farina@aosp.bo.it)

34

35 Manfredi Greco: Dipartimento di Scienze Biomediche e Neuromotorie, Alma Mater Studiorum – Università  
36 di Bologna. Via San Giacomo 12, 40126, Bologna, Italy. [manfredi.greco@studio.unibo.it](mailto:manfredi.greco@studio.unibo.it)

37

38 Simona Rosa, MSc: Dipartimento di Scienze Biomediche e Neuromotorie, Alma Mater Studiorum –  
39 Università di Bologna. Via San Giacomo 12, 40126, Bologna, Italy. [simona.rosa@unibo.it](mailto:simona.rosa@unibo.it)

40

41 Michelle Beleffi MD: Alma Mater Studiorum - Università di Bologna. Via Zamboni, 33 - 40126 Bologna,  
42 Italy. [michellebeleffi@gmail.com](mailto:michellebeleffi@gmail.com)

43

44 Bianca Biavati MD:Alma Mater Studiorum - Università di Bologna. Via Zamboni, 33 - 40126 Bologna, Italy.  
45 [biavati.bianca@gmail.com](mailto:biavati.bianca@gmail.com)

46

47 Francesca Campinoti MD:Alma Mater Studiorum - Università di Bologna. Via Zamboni, 33 - 40126  
48 Bologna, Italy. [campinotifrancesca@gmail.com](mailto:campinotifrancesca@gmail.com)

49

50 Stefania Guerrini MD: Policlinico S. Orsola-Malpighi. Dipartimento dell'Emergenza-Urgenza. Unità  
51 operativa di Medicina d'urgenza e Pronto Soccorso. Via Giuseppe Massarenti, 9, 40138, Bologna, Italy.

52 [stefania.guerrini@aosp.bo.it](mailto:stefania.guerrini@aosp.bo.it)

53

54 Rodolfo Ferrari MD: Ospedale S. Maria della Scaletta. Dipartimento di Emergenza-urgenza e Accettazione.  
55 Unità Operativa di Pronto Soccorso e Medicina d'Urgenza. Viale Amendola, 2 – 40026 Imola, Italy.  
56 [r.ferrari@ausl.imola.bo.it](mailto:r.ferrari@ausl.imola.bo.it)

57

58 Paola Rucci, PhD: Dipartimento di Scienze Biomediche e Neuromotorie, Alma Mater Studiorum –  
59 Università di Bologna. Via San Giacomo 12, 40126, Bologna, Italy. [paola.rucci2@unibo.it](mailto:paola.rucci2@unibo.it)

60 ORCID: 0000-0002-7704-0831

61

62 Maria Pia Fantini, MD: Dipartimento di Scienze Biomediche e Neuromotorie, Alma Mater Studiorum –  
63 Università di Bologna. Via San Giacomo 12, 40126, Bologna, Italy. [mariapia.fantini@unibo.it](mailto:mariapia.fantini@unibo.it)

64 ORCID: 0000-0002-3257-6552

65

66 Fabrizio Giostra MD: Policlinico S. Orsola-Malpighi. Dipartimento dell'Emergenza-Urgenza. Unità  
67 operativa di Medicina d'urgenza e Pronto Soccorso. Via Giuseppe Massarenti, 9, 40138, Bologna, Italy.

68 [fabrizio.giostra@aosp.bo.it](mailto:fabrizio.giostra@aosp.bo.it)

69

#### 70 **Corresponding author**

71 Luca Santi, MD: Policlinico S. Orsola-Malpighi. Dipartimento dell'Emergenza-Urgenza. Unità operativa di  
72 Medicina d'urgenza e Pronto Soccorso. Via Giuseppe Massarenti, 9, 40138, Bologna, Italy. email:

73 [lucasanti@hotmail.it](mailto:lucasanti@hotmail.it) Tel: + 39 0512143324

74

75

76

77

78 **Non-COVID-19 patients in times of pandemic: decreased Emergency Department visits and**  
79 **increased out-of-hospital mortality in Northern Italy**

80

81

82 **Abstract**

83 **Objective.** The aim of this was to assess the short-term impact of the pandemic on non-COVID-19 patients living in a  
84 one-million inhabitants area in Northern Italy (Bologna Metropolitan Area-BMA), analyzing time trends of Emergency  
85 Department (ED) visits, hospitalizations and mortality.

86 **Methods.** We conducted a retrospective observational study using data extracted from BMA healthcare informative  
87 systems. Weekly trends of ED visits, hospitalizations, in- and out-of-hospital, all-cause and cause-specific mortality  
88 between December 1<sup>st</sup>, 2019 to May 31<sup>st</sup>, 2020, were compared with those of the same period of the previous year,  
89 using Joinpoint regression models and incidence rate ratios.

90 **Results.** Non-COVID-19 ED visits and hospitalizations showed a stable trend until the first Italian case of COVID-19  
91 has been recorded, on February 19<sup>th</sup>, 2020, when they dropped simultaneously. The reduction of ED visits was observed  
92 in all age groups and across all severity and diagnosis groups. In the lockdown period a significant increase was found  
93 in overall out-of-hospital mortality (43.2%) and cause-specific out-of-hospital mortality related to neoplasms (76.7%),  
94 endocrine, nutritional and metabolic (79.5%) as well as cardiovascular (32.7%) diseases.

95 **Conclusions.** The pandemic caused a sudden drop of ED visits and hospitalizations of non-COVID-19 patients during  
96 the lockdown period, and a concurrent increase in out-of-hospital mortality mainly driven by deaths for neoplasms,  
97 cardiovascular and endocrine diseases. The findings of this study might be useful to understand both the population  
98 reaction and the healthcare system response at the early phases of the pandemic in terms of reduced demand of care and  
99 systems capability in intercepting it.

100

101

102

## 103 **Introduction**

### 104 **Background**

105 Globally, the Coronavirus Disease (COVID-19) pandemic represents a dramatic burden for healthcare services. Italy  
106 was the first Western country affected by the pandemic. The first case of local transmission of Severe Acute Respiratory  
107 Syndrome Coronavirus 2 (SARS-CoV-2) in Italy was confirmed in a thirty eight-year-old man in the municipality of  
108 Codogno (Lombardy region) on February 19<sup>th</sup>, 2020 [1], while on February 21<sup>st</sup>, a resident of Vo', a small town near  
109 Padua (Veneto Region), died of pneumonia due to SARS-CoV-2 infection [2,3]. In the following weeks, an exponential  
110 growth in the number of cases and deaths in the neighboring regions of northern Italy was observed. As a consequence,  
111 the national government enforced as containment measures a complete country lockdown on March 10<sup>th</sup>, 2020: at that  
112 stage the confirmed cases in Italy were 10,149 and deaths 631 [4]. Hospitals and Emergency Departments (EDs) were  
113 forced to rapidly adjust to this completely new situation in order to manage an extraordinarily high number of  
114 contagious patients with respiratory symptoms [5]

115 However, something else changed due to the pandemic as rapidly as the spread of SARS-CoV-2. As a matter of fact, the  
116 pandemic determined a sudden and significant reduction of non-COVID-19 patients seeking for treatment due to urgent  
117 medical conditions [6]. This reduction in ED visits might impact the health status of non-COVID patients with acute  
118 and chronic diseases [7].

119 In order to better understand this phenomenon and its possible consequences, we retrospectively analyzed amount and  
120 type of ED visits, hospitalizations and mortality during lockdown and the preceding and following periods, in the  
121 metropolitan area of Bologna (BMA) (~1,000,000 inhabitants), which is the principal town of one of the first and most  
122 affected region of Italy and Europe, Emilia Romagna.

123 We hypothesized that trends of ED visits might have been influenced by age, as school closure and social distancing  
124 measures might have differently impacted on young and elderly health needs. Moreover, the reduction of ED accesses  
125 due to fear of contagion and favored by the stay-at-home message launched on general and social media might also  
126 have differently affected the severity pattern of ED accesses. Indeed, we predicted a significant reduction of less severe  
127 conditions referring to EDs, whereas no decrease of emergency conditions was expected, including the need of urgent  
128 surgical intervention or ICU treatment. We also expected at least a progressive return of ED accesses and

129 hospitalizations to the pre-COVID-19 era levels during the post lockdown phase. No remarkable changes in all-cause  
130 and cause-specific mortality, and in the place of death were hypothesized.

131 Our first aim was to compare time trends of ED visits, hospitalizations, in- and out-of-hospital all-cause and cause-  
132 specific mortality of non-COVID-19 patients during the first months of the pandemic with the same period of 2019, as  
133 possible indicators of unmet healthcare needs.

134 The secondary aim was to subdivide ED patients by age, diagnosis and illness severity, compare their trends, and  
135 analyze hospitalizations' trends, focusing on the receiving hospital department (surgical department, medical  
136 department, intensive care unit (ICU)).

137

## 138 **Methods**

### 139 **Study design, population and setting**

140 We conducted a retrospective observational study using anonymous data extracted from the healthcare administrative  
141 databases and informative systems of BMA, Northern Italy.

142 The study population consisted of all age residents in BMA, which encompasses the city of Bologna and the  
143 neighboring municipalities, for a total of 1,019,875 citizens as of January 1<sup>st</sup>, 2020 [8]. The demographic characteristics  
144 of the population are reported in Table 1 [Suppl mat].

145 In the BMA, the first patient reported with SARS-CoV-2 infection was recorded on February 28<sup>th</sup>. On May 31<sup>st</sup>, the  
146 number of infected patients was 5,021 with 684 deaths [4].

147 The BMA healthcare system consists of twelve hospitals equipped with EDs. Among these, four are located in the urban  
148 area and two of these are large university hospitals, four are suburban whereas the last four are rural hospitals. The  
149 volume of patients annually assessed in the different EDs ranges from ~3,000 up to ~150,000 in 2019.

150 This study follows the STROBE reporting guidelines for observational studies.

151

### 152 **Study data**

153 We examined the weekly trends of ED visits, hospitalizations of patients admitted from ED and in- and out-of-hospital  
154 all-cause and cause-specific mortality between December 1<sup>st</sup>, 2019 to May 31<sup>st</sup>, 2020, and compared them with the  
155 trends of the same period of the previous year.

156 The study period was subdivided into four periods, starting from the beginning of the flu peak up to four weeks after the  
157 end of the national lockdown. Namely, the following are the four subgroups of the study period:

- 158 • flu period (from December 1<sup>st</sup>, 2019 to February 23<sup>rd</sup>, 2020the outbreak of the COVID-19 pandemic to the first  
159 containment measures, i.e. from the beginning of the flu period to week 49<sup>th</sup> 2019 to week 8<sup>th</sup> 2020);
- 160 • pre-lockdown period (from the initial alarm period in the absence of containment institutional measures until the  
161 lockdown institution, i.e. February 24<sup>th</sup>, 2020 to March 9<sup>th</sup>, 2020, weeks 9<sup>th</sup> to 10<sup>th</sup> 2020);
- 162 • lockdown period (March 10<sup>th</sup>, 2020 to May 3<sup>rd</sup>, 2020, weeks 11<sup>th</sup> to 18<sup>th</sup> 2020);
- 163 • post-lockdown period (i.e. the reopening period, from the May 4<sup>th</sup>, 2020 to May 31<sup>st</sup>, 2020, week 19<sup>th</sup> to 22<sup>nd</sup> 2020).

164 The data sources include the Emergency Department Database, the mortality registry updated to June 2020 and the Civil  
165 Protection Database [4]. For the purpose of the present study, the data extracted from the diverse databases were the  
166 following: weekly number of ED visits, type of ED visits (main diagnosis, severity code), patients characteristics (age,  
167 gender), weekly number of hospitalizations, department of hospitalization (medical, surgical, ICU), weekly number of  
168 deaths, cause of death (main diagnosis) and place of death (in-hospital, out-of-hospital).

169 The main diagnosis of ED visits and deaths was coded through the International Classification of Diseases Clinical  
170 Modification Ninth (ICD-9-CM) and Tenth (ICD-10-CM) versions, respectively.

171 Non-COVID-19 cases were identified by excluding the COVID-19 cases diagnosed by the emergency physician as  
172 suspected or confirmed (ICD-9-CM codes 480,480.3,079.82,V01.82,V01.79), in primary or secondary diagnosis of  
173 discharged and hospitalized patients. For all mortality data, the specific codes related to COVID-19 and SARS-CoV-2  
174 infection (U00-U85) were ruled out.

175

176 **Statistical analysis**

177 The demographic and clinical characteristics of the population were summarized using mean and standard deviation or  
178 absolute and percentage frequencies.

179 We analyzed and displayed trends of ED visits, hospital admissions, and mortality, divided into the four time periods  
180 and compared them with those of the same periods of the previous year.

181 The trends of ED visits, hospitalizations and all-cause mortality were analyzed using the Joinpoint Trend Analysis  
182 Software 4.6.0.0 (Statistical Research and Applications Branch, National Cancer Institute, USA) [9]. Joinpoint models  
183 allowed to identify changes in the slopes of ED visits and hospitalizations during the periods of interest.

184 We carried out a preliminary analysis comparing the time trend of ED visits, hospitalizations and mortality rates in 2019  
185 with those of the years 2014-2018. This analysis showed no significant changes in ED visits, hospitalizations and  
186 mortality overtime. Therefore, we considered 2019 as the reference year.

187 For what concerns age of non-COVID-19 ED patients during pandemic, it was classified into three groups: pediatric  
188 patients (0-14 years), adults (15-64 year) and elderly ( $\geq 65$  years). We also classified ED visits according to the triage  
189 code (red, yellow, green and white) and by ICD-9-CM disease category and specific cause.

190 Then, we compared the trends of admissions to hospital departments between 2019 and 2020.

191 We also analyzed the trends of all-cause, cause-specific and in-hospital (public or private) and out-of-hospital (home,  
192 social welfare structure, other) mortality between 2019 and 2020. The latter was also split into cause-specific out-of-  
193 hospital mortality.

194 Incidence rate ratios (IRRs) of hospitalizations and mortality in 2020 vs. 2019 were estimated using Poisson regression  
195 models.

196

197

## 198 **Results**

199 The empirical trends of ED visits, hospitalizations and mortality in 2019 and 2020 are reported in Figure 1.

200

201



202 **Figure 1. Trend of ED visits (a), hospitalizations (b) and mortality (c) during the study periods for years 2019 and**  
 203 **2020. For a better comprehension of the burden of the pandemic on health care services, we displayed the trend**  
 204 **of the three indicators including and excluding SARS-CoV-2 related data<sup>a</sup>.**

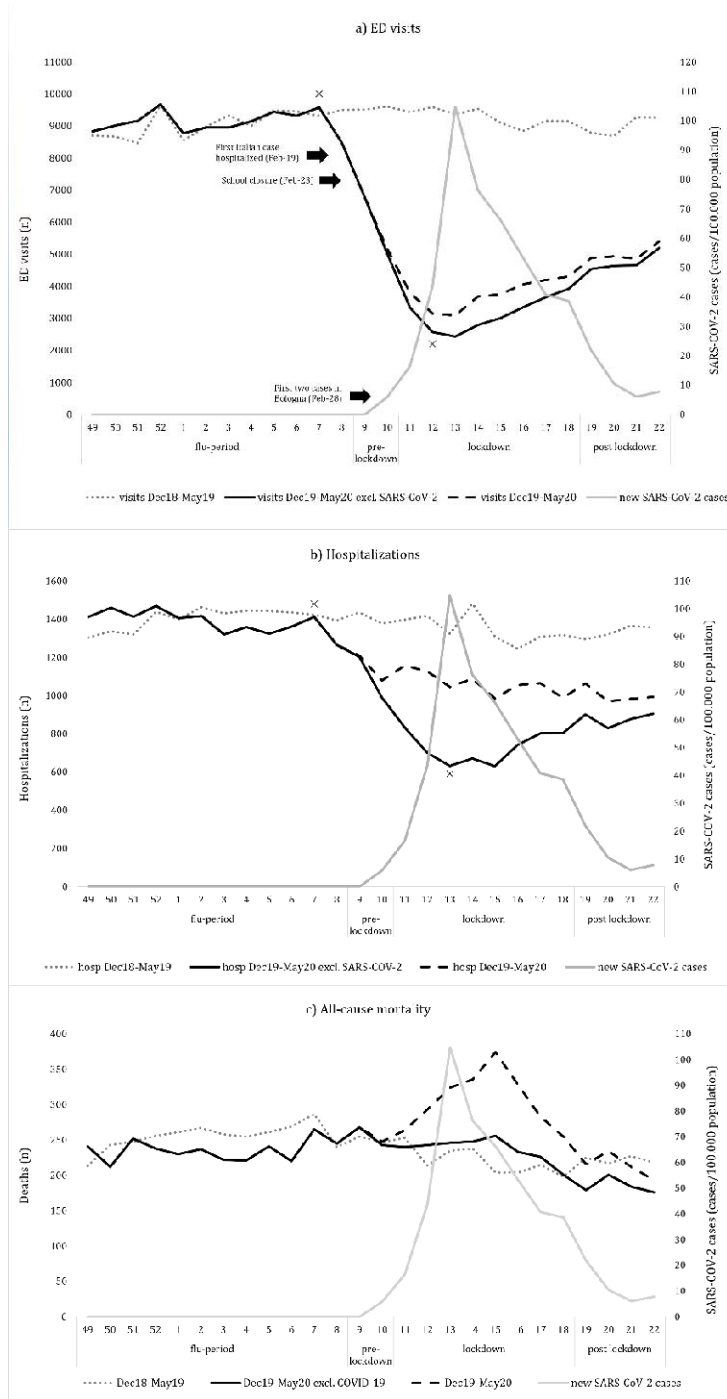

205  
 206 <sup>a</sup>Note: SARS-CoV-2 cases weekly incidence is reported on the right y-axis.

207 <sup>x</sup> Using Joinpoint analysis, a significant change of trend ( $p < 0.05$ ) was identified between week 8-9 and then week 12-13 2020 for ED  
 208 visits and between week 8-9 and then 13-14 for hospitalizations. The analysis of mortality data showed a slight significant change  
 209 during week 15 2020.

210 **ED visits**

211 Figure 1a shows that the number of ED visits was almost stable in the year 2019 until the end of 2020 flu period, when  
212 it dropped simultaneously with the exponential growth of the local SARS-CoV-2 case curve. Then, during the lockdown  
213 period the number of ED visits started to rise, but with a slower pace when compared to the previous decrease.

214 Joinpoint analysis showed a significant ( $p<0.05$ ) reduction in ED visits starting from week nine (pre-lockdown period),  
215 leading to the lowest numbers at the thirteenth week during lockdown, then followed again by a significant increase  
216 ( $p<0.05$ ) at the fourteenth week. During the lockdown period the overall reduction in ED visits compared to same  
217 period of the previous year was -66.2% (Table 2 [Suppl mat]). ED accesses' decrease occurred during the steep climb of  
218 COVID-19 spread until the peak. The subsequent slow increase in ED visits never returned to the previous year levels,  
219 not even at the end of the study period, four weeks after the end of the national lockdown.

220 The impressive reduction in the number of ED visits was found in all age groups, throughout all study periods (except  
221 for the flu period) (Table 3 [Suppl mat]). The highest decrease was observed in pediatric patients during lockdown (-  
222 83.2%), although even adults and elderly patients ED accesses declined by 62.9% and 64.0%, respectively (Table 3  
223 [Suppl mat]).

224 For what concerns triage severity codes of non-COVID-19 patients, the 4 codes were affected by the pandemic  
225 similarly; as a matters of fact, a reduction regarded similarly the four triage codes (Figure 2) during the study periods  
226 (except for the flu period) if compared to the previous year, with the most important decrease (between 60% and 70%)  
227 observed during lockdown.

228

229 **Figure 2. Percentage change in ED visits by severity code compared to the previous year.**

230

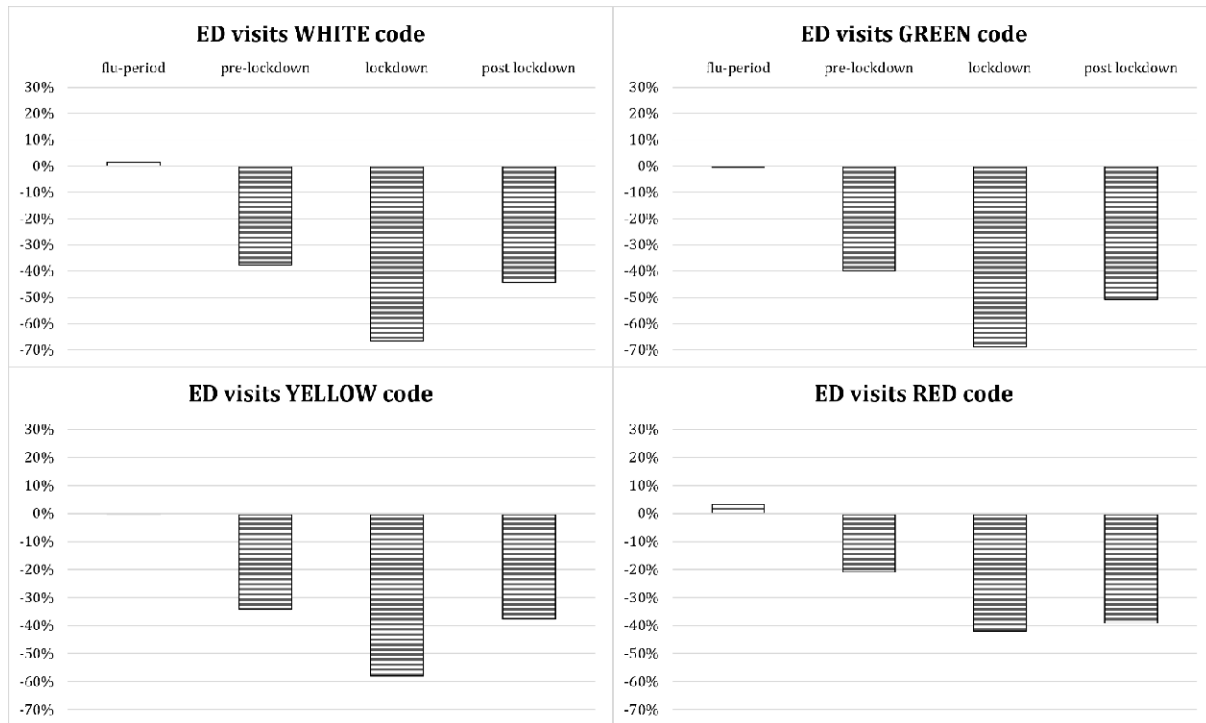

231  
232

233 Note: ED visits are categorized by severity codes according to the triage protocols in four levels of urgency: white code (not-urgent  
234 condition), green code (postponable conditions); yellow code (medical condition requiring urgent care with no vital signs  
235 impairment but at-risk for deterioration); red code (medical condition with acute impairment of vital signs requiring emergency care).

236

237

238 As for non-COVID ED visits for specific conditions, our analysis demonstrated a reduction which broadly affected all  
239 disease categories, ranging from 41% to 83% in the lockdown period (Figure 3). The decrease of ED visits was more  
240 pronounced for infectious and parasitic diseases (-83%), skin and subcutaneous tissue pathogenic conditions (-80%),  
241 and congenital anomalies (-78%) (Figure 3). A remarkable decrease in ED visits was also observed for conditions  
242 usually significantly impacting on BMA's EDs (data not shown), such as diseases of the cardiovascular system (-58%)  
243 as well as endocrine, nutritional and metabolic diseases (-63%). Specifically, the remarkable reduction in ED visits  
244 interested life-threatening illnesses, such as ischemic heart disease (-49.7%), intracranial hemorrhages (-33.3%) and  
245 ischemic cerebrovascular disorders (-45.8 %) (Table 4 [Suppl mat]). Lower reductions or a modest increase were  
246 recorded in complications of pregnancy, childbirth and the puerperium and some morbid conditions of perinatal origin  
247 (+8% during pre-lockdown, -36% during lockdown, and -30% during post-lockdown period) (Figure 3).

248 **Figure 3. Percentage change in ED visits by disease category compared to the previous year.**

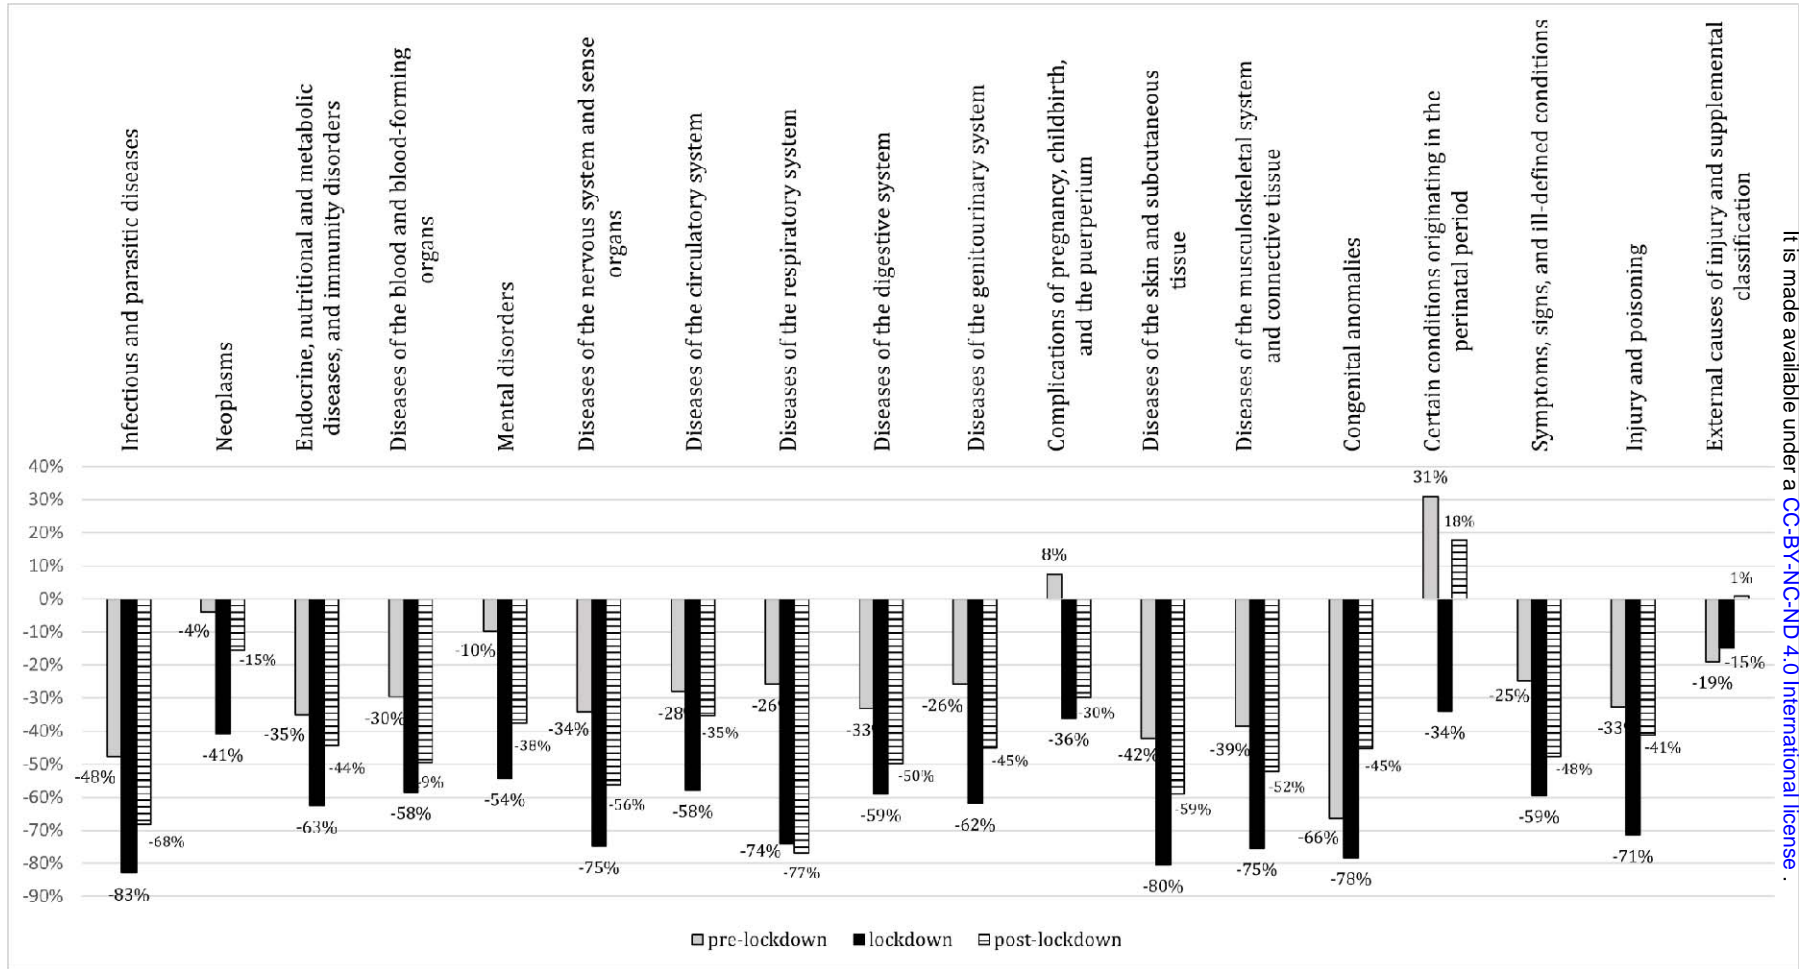

249

250 <sup>a</sup> Note: no remarkable changes of ED visits by disease category have been found during the flu period (data not shown).

251

252 **Hospitalizations**

253 Figure 1b shows hospitalizations trends in the study periods, which appears to be quite stable during year 2019 until the  
254 end of 2020 flu period. Similarly to ED visits trends, hospital admissions started to drop simultaneously with the  
255 exponential growth of the local SARS-CoV-2 case curve. The number of hospitalizations started to rise again during the  
256 lockdown period, but with a slower pace.

257 Joinpoint analysis showed that non-COVID hospitalizations significantly ( $p < 0.05$ ) declined between weeks eight and  
258 fourteen before the peak of incidence of COVID-19 cases, and moderately increased afterwards (Figure 1).

259 The overall reduction of hospitalizations was -46% during the lockdown period compared to previous year (Table 2  
260 [Suppl mat]). Admissions to all hospital departments declined during and after lockdown (Table 1). During lockdown,  
261 admissions reduction was significant and interested likewise surgical and medical departments (-36.0%) as well as ICUs  
262 (-36.4%).

263 **Table 1. Number and percentage change of hospitalizations in Medicine, Surgery and ICU departments, year 2020 compared to 2019.**

|                            | 2020 (n)   |              |          |               | Change from previous year (%) |              |          |               | Incidence Rate Ratio [95% CI]       |                                     |                                     |                                     |
|----------------------------|------------|--------------|----------|---------------|-------------------------------|--------------|----------|---------------|-------------------------------------|-------------------------------------|-------------------------------------|-------------------------------------|
|                            | Flu-period | Pre-lockdown | Lockdown | Post-lockdown | Flu-period                    | Pre-lockdown | Lockdown | Post-lockdown | Flu-period                          | Pre-lockdown                        | Lockdown                            | Post-lockdown                       |
| <b>Medicine</b>            | 9,903      | 1,493        | 4,072    | 2,441         | -1.5%                         | -11.9%       | -36.0%   | -22.3%        | 0.986<br>[0.961-1.013]              | 0.883 <sup>a</sup><br>[0.824-0.946] | 0.654 <sup>a</sup><br>[0.629-0.679] | 0.782 <sup>a</sup><br>[0.742-0.824] |
| <b>Surgery</b>             | 4,112      | 647          | 1,775    | 1,122         | -5.9%                         | -7.3%        | -36.0%   | -19.4%        | 0.943 <sup>a</sup><br>[0.905-0.984] | 0.927<br>[0.834-1.032]              | 0.647 <sup>a</sup><br>[0.610-0.686] | 0.808 <sup>a</sup><br>[0.747-0.874] |
| <b>Intensive Care Unit</b> | 709        | 100          | 286      | 186           | 2.3%                          | -21.3%       | -36.4%   | -18.4%        | 1.023<br>[0.922-1.135]              | 0.788<br>[0.606-1.023]              | 0.637 <sup>a</sup><br>[0.549-0.738] | 0.816 <sup>a</sup><br>[0.673-0.990] |

<sup>a</sup> p<0.05

264

265

266 **Mortality**

267 The trend of non-COVID-19 mortality was similar in 2019 and 2020, with a slight decline after the winter season  
268 (Figure 1c).

269 A small increase in all-cause overall mortality (7.5%) was observed only during lockdown (IRR 1.074,  $p < 0.05$ , 95%CI  
270 [1.007-1.145]) (table 2), whereas in both pre- and post-lockdown periods no significant change in mortality was  
271 detectable. Lockdown was associated with a significantly higher cause-specific mortality related to endocrine,  
272 nutritional and metabolic diseases (47.9%, IRR 1.478,  $p < 0.05$ , 95%CI [1.094-1.998]) and diseases of the circulatory  
273 system (15.5%, IRR 1.154,  $p < 0.05$ , 95%CI [1.031-1.291]). Conversely, mortality reduced only for infectious and  
274 parasitic diseases (-36.2%, IRR 0.638,  $p < 0.05$ , 95%CI [0.437-0.931]). As for mental, behavioral and neuro-  
275 developmental disorders, a significant increase in mortality during the pre-lockdown period was observed, while deaths  
276 for neoplasms decreased during the post-lockdown weeks (Table 2).

277 We found a significant increase in out-of-hospital mortality, particularly during the lockdown weeks (43.2%, IRR 1.428,  
278  $p < 0.05$ , 95%CI [1.295-1.574]), whereas in the pre-lockdown period and in the post-lockdown period no remarkable  
279 changes were identified. A concurrent reduction of in-hospital mortality was observed (-15.0%, IRR 0.759,  $p < 0.05$ ,  
280 95%CI [0.694-0.831]).

281 Analysis of cause-specific out-of-hospital mortality (Table 2) confirmed an increase in deaths for neoplasms, endocrine,  
282 nutritional and metabolic diseases, and diseases of the circulatory systems during lockdown. Conversely, we found a  
283 significant reduction only in genitourinary disorders.

284

285

286 **Table 2. Number and percentage change of all-cause mortality (overall and cause-specific), in-hospital and out-of-hospital mortality (overall and cause-specific),**  
 287 **year 2020 compared to 2019.**

|                                                                            | 2020 (n)      |                  |               |                   | Change from previous year (%) |                  |               |                   | Incidence Rate Ratio<br>[95% CI]      |                                     |                                       |                                       |
|----------------------------------------------------------------------------|---------------|------------------|---------------|-------------------|-------------------------------|------------------|---------------|-------------------|---------------------------------------|-------------------------------------|---------------------------------------|---------------------------------------|
|                                                                            | Flu<br>Period | Pre-<br>lockdown | Lock-<br>down | Post-<br>lockdown | Flu<br>Period                 | Pre-<br>lockdown | Lock-<br>down | Post-<br>lockdown | Flu Period                            | Pre-lockdown                        | Lock-down                             | Post-lockdown                         |
| <b>Certain infectious and parasitic diseases</b>                           | 90            | 15               | 44            | 32                | -12.6%                        | -25.0%           | -36.2%        | -3.0%             | 0.874<br>[0.659-1.159]                | 0.750<br>[0.384-1.465]              | 0.638 <sup>a</sup><br>[0.437-0.931]   | 0.970<br>[0.596-1.577]                |
| <b>Neoplasms</b>                                                           | 722           | 137              | 489           | 213               | -2.2%                         | 14.2%            | 2.1%          | -22.0%            | 0.979<br>[0.883-1.084]                | 1.142<br>[0.894-1.458]              | 1.021<br>[0.900-1.158]                | 0.781 <sup>a</sup><br>[0.653-0.934]   |
| <b>Endocrine, nutritional and metabolic diseases</b>                       | 138           | 18               | 105           | 29                | 0.0%                          | 20.0%            | 47.9%         | -9.4%             | 1.000<br>[0.790-1.266]                | 1.200<br>[0.605-2.381]              | 1.478 <sup>a</sup><br>[1.094-1.998]   | 0.906<br>[0.548-1.498]                |
| <b>Mental, Behavioral and Neurodevelopmental disorders</b>                 | 131           | 35               | 83            | 45                | -12.7%                        | 84.2%            | -3.5%         | 9.8%              | 0.874<br>[0.691-1.104]                | 1.842 <sup>a</sup><br>[1.054-3.219] | 0.965<br>[0.714-1.305]                | 1.098<br>[0.719-1.676]                |
| <b>Diseases of the nervous system</b>                                      | 118           | 23               | 72            | 24                | 18.0%                         | -8.0%            | 5.9%          | -4.0%             | 1.180<br>[0.904-1.540]                | 0.920<br>[0.522-1.621]              | 1.059<br>[0.760-1.475]                | 0.960<br>[0.548-1.681]                |
| <b>Diseases of the circulatory system</b>                                  | 915           | 161              | 650           | 229               | -14.2%                        | -4.7%            | 15.5%         | -16.7%            | 0.860 <sup>a</sup><br>[0.787-0.939]   | 0.953<br>[0.768-1.182]              | 1.154 <sup>a</sup><br>[1.031-1.291]   | 0.833 <sup>a</sup><br>[0.699-0.993]   |
| <b>Diseases of the respiratory system</b>                                  | 325           | 49               | 218           | 60                | -11.2%                        | -29.0%           | 19.8%         | -26.8%            | 0.888<br>[0.765-1.031]                | 0.710<br>[0.493-1.024]              | 1.197<br>[0.984-1.458]                | 0.732<br>[0.525-1.021]                |
| <b>Diseases of the digestive system</b>                                    | 100           | 14               | 64            | 28                | -11.5%                        | 0.0%             | 12.3%         | 0.0%              | 0.885<br>[0.676-1.158]                | 1.000<br>[0.477-2.098]              | 1.123<br>[0.786-1.604]                | 1.000<br>[0.592-1.688]                |
| <b>Diseases of the genitourinary system</b>                                | 62            | 19               | 36            | 24                | -8.8%                         | 58.3%            | -25.0%        | 0.0%              | 0.912<br>[0.646-1.286]                | 1.583<br>[0.769-3.261]              | 0.750<br>[0.487-1.155]                | 1.000<br>[0.568-1.761]                |
| <b>Injury, poisoning and certain other consequences of external causes</b> | 120           | 24               | 77            | 35                | -8.4%                         | 9.1%             | -2.5%         | -16.7%            | 0.916<br>[0.715-1.173]                | 1.091<br>[0.612-1.945]              | 0.975<br>[0.712-1.334]                | 0.833<br>[0.532-1.305]                |
| <b>Other<sup>a</sup></b>                                                   | 103           | 16               | 55            | 21                | 21.2%                         | -5.9%            | -6.8%         | -34.4%            | 1.212<br>[0.909-1.614]                | 0.941<br>[0.476-1.863]              | 0.932<br>[0.646-1.346]                | 0.656<br>[0.379-1.138]                |
| <b>All-cause overall mortality</b>                                         | 2,824         | 511              | 1,893         | 740               | -7.7%                         | 1.8%             | 7.5%          | -16.6%            | 0.926 <sup>a</sup><br>[0.880-0.973]   | 1.018<br>[0.900-1.151]              | 1.074 <sup>a</sup><br>[1.007-1.145]   | 0.836 <sup>a</sup><br>[0.758-0.921]   |
| <b>In-hospital overall mortality</b>                                       | 1,648         | 289              | 918           | 426               | -6.5%                         | -4.9%            | -15.0%        | -19.3%            | 0.936<br>[0.876 - 1.000]              | 0.951<br>[0.810 - 1.117]            | 0.759 <sup>a</sup><br>[0.694 - 0.831] | 0.808 <sup>a</sup><br>[0.711 - 0.917] |
| <b>Out-of-hospital overall mortality</b>                                   | 1,176         | 222              | 975           | 314               | -9.2%                         | 12.1%            | 43.2%         | -12.5%            | 0.909 <sup>a</sup><br>[0.841 - 0.983] | 1.121<br>[0.926 - 1.357]            | 1.428 <sup>a</sup><br>[1.295 a 1.574] | 0.875<br>[0.752 - 1.018]              |
| <b>Certain infectious and parasitic diseases</b>                           | 15            | 1                | 7             | 3                 | 66.7%                         | 0.0%             | 133.3%        | -25.0%            | 1.667<br>[0.729 - 3.808]              | 1.000<br>[0.063 - 15.988]           | 2.333<br>[0.603 - 9.023]              | 0.750<br>[0.168 - 3.351]              |



|                                                                            |     |    |     |     |        |        |        |        |                                       |                          |                                        |                                       |
|----------------------------------------------------------------------------|-----|----|-----|-----|--------|--------|--------|--------|---------------------------------------|--------------------------|----------------------------------------|---------------------------------------|
| <b>Neoplasms</b>                                                           | 232 | 42 | 228 | 85  | -2.1%  | 50.0%  | 76.7%  | -8.6%  | 0.979<br>[0.817 - 1.173]              | 1.500<br>[0.930 - 2.419] | 1.766 <sup>a</sup><br>[1.4230 - 2.191] | 0.914<br>[0.681 - 1.226]              |
| <b>Endocrine, nutritional and metabolic diseases</b>                       | 77  | 9  | 61  | 15  | -2.5%  | 12.5%  | 79.4%  | -6.3%  | 0.975<br>[0.712 - 1.334]              | 1.125<br>[0.434 - 2.916] | 1.794 <sup>a</sup><br>[1.179 - 2.728]  | 0.937<br>[0.464 - 1.896]              |
| <b>Mental, Behavioral and Neurodevelopmental disorders</b>                 | 68  | 18 | 52  | 29  | -17.1% | 80.0%  | 40.5%  | 123.1% | 0.829<br>[0.601 - 1.144]              | 1.780<br>[0.831 - 3.899] | 1.405<br>[0.922 - 2.142]               | 2.230 <sup>a</sup><br>[1.160 - 4.290] |
| <b>Diseases of the nervous system</b>                                      | 73  | 14 | 52  | 12  | 40.4%  | 16.7%  | 36.8%  | -14.3% | 1.404<br>[0.984 - 2.003]              | 1.167<br>[0.540 - 2.522] | 1.368<br>[0.901 - 2.079]               | 0.857<br>[0.397 - 1.853]              |
| <b>Diseases of the circulatory system</b>                                  | 486 | 95 | 418 | 115 | -15.9% | 1.1%   | 32.7%  | -21.2% | 0.842 <sup>a</sup><br>[0.746 - 0.949] | 1.011<br>[0.760 - 1.344] | 1.326 <sup>a</sup><br>[1.146 - 1.534]  | 0.788<br>[0.617 - 1.006]              |
| <b>Diseases of the respiratory system</b>                                  | 85  | 9  | 59  | 17  | -13.3% | -43.8% | 47.5%  | -15.0% | 0.868<br>[0.649 - 1.160]              | 0.563<br>[0.249 - 1.273] | 1.477<br>[0.987 - 2.203]               | 0.850<br>[0.445 - 1.623]              |
| <b>Diseases of the digestive system</b>                                    | 14  | 3  | 14  | 5   | 7.7%   | -25.0% | 40.0%  | 25.0%  | 1.077<br>[0.506 - 2.291]              | 0.750<br>[0.168 - 3.351] | 1.400<br>[0.622 - 3.152]               | 1.250<br>[0.336 - 4.655]              |
| <b>Diseases of the genitourinary system</b>                                | 16  | 4  | 4   | 5   | -20.0% | 33.3%  | -71.4% | -37.5% | 0.800<br>[0.415 - 1.544]              | 1.333<br>[0.298 - 5.957] | 0.286 <sup>a</sup><br>[0.094 - 0.868]  | 0.625<br>[0.205 - 1.911]              |
| <b>Injury, poisoning and certain other consequences of external causes</b> | 52  | 16 | 39  | 17  | -27.8% | 60.0%  | 11.4%  | -15.0% | 0.722<br>[0.506 - 1.032]              | 1.600<br>[0.726 - 3.525] | 1.114<br>[0.706 - 1.759]               | 0.850<br>[0.445 - 1.623]              |
| <b>Other<sup>b</sup></b>                                                   | 58  | 11 | 41  | 11  | 5.5%   | -8.3%  | 57.7%  | -47.6% | 1.055<br>[0.729 - 1.525]              | 0.917<br>[0.405 - 2.077] | 1.577<br>[0.965 - 2.577]               | 0.524<br>[0.253 - 1.087]              |

<sup>a</sup> p<0.05

<sup>b</sup> Causes of deaths that accounted for ≤0.5% of the total (ICD-10-CM categories D50-89, H00-95, L00-99, M00-99, O00-9A, P00-96, Q00-99, R00-99, V00-Y99, Z00-99) were included in Other.

288  
289  
290  
291

## 292 **Discussion**

293 Globally, Italy has been the first Western country to experience the disruptive effect of the pandemic in terms of cases,  
294 deaths and the related burden on healthcare services [1-3, 10]. Since the beginning of the pandemic, a reduction of ED  
295 visits and hospitalizations overall [6] and for specific diseases [11-15] have been reported worldwide.

296 In this paper we studied the pandemic consequences on non-COVID-19 patients in an area accounting for over one  
297 million inhabitants. We highlighted how ED visits and hospitalizations reduced overall, and particularly during the  
298 lockdown period. To the best of our knowledge, this is the first study to analyze also the trends of in- and out-of-  
299 hospital, all-cause and cause-specific mortality, providing a comprehensive picture of the short-term consequences of  
300 the pandemic on non-COVID-19 patients in Italy, the first hit European country.

301 Our findings indicate that the reduction of ED visits and hospitalizations started two weeks before the beginning of the  
302 national lockdown, after school closures and the first Italian case hospitalized for COVID-19 in Codogno [1], when no  
303 cases of local transmission had been still recorded in BMA. As already reported [2, 6, 18-20], a possible explanation is  
304 that the population response is likely to be more affected by the national level authority risk message than the real local  
305 situation [21]. Several possible reasons have been put forward to explain, at least partially, a reduction in ED visits and  
306 hospitalizations [6, 7]. In addition to pathologies likely reduced by the lockdown and lifestyle changes, this may have  
307 been caused by fear of the contagion, as well as by media campaigns encouraging to stay-at-home, together with the  
308 increasingly stringent lockdown measures and postponement of elective procedures, or the sense of civic responsibility  
309 of the population [7].

310 It should be highlighted that not all ED visits represent real emergencies, and inappropriate accesses to ED are a well-  
311 known issue related to several reasons [7, 20, 22, 23]. That being said, the observed reduction of the less severe triage  
312 codes was to somewhat expected, although not to this large extent. What we were not prepared for was the concurrent  
313 decrease of the most serious cases. Furthermore, we showed how ED visits' reduction encompassed all pathological  
314 conditions, thus including also acute and time-dependent diseases, similarly to what already reported in literature [24-  
315 26]. The overall reduction of ED visits, regardless of age, severity, and causes, suggests the system's inability to guide  
316 the patient in discriminating the real need for urgent care. Therefore, public awareness should be taken into due  
317 consideration to be prepared for a recrudescence of the pandemic.

318 A clear reduction of non-COVID-19 patients hospitalization has also been recorded, both for medical and surgical  
319 diseases and for conditions requiring intensive care support. Data on hospital admissions reported in previous studies  
320 [6,12] appear to be not comparable, as obtained from selected populations [12] or different healthcare systems, such as  
321 U.S. care system or other insurance-based systems [6]. In fact, unlike the U.S., the Italian National Healthcare Service  
322 is a single-payer system funded by general taxation, similarly to the UK national health service [27]. This could have  
323 an impact on a system's hospitalization rate [28].

324 Looking at the post-lockdown period, when the spread of COVID-19 was contained, we expected to see a progressive  
325 increase in ED visits and a consequent increase in hospitalizations, as a consequence of the delay in obtaining medical  
326 attention and care access due to lockdown. However, even if these indicators started to rise during the lockdown weeks  
327 and throughout the post-lockdown period, they did not reach the pre-pandemic levels.

328 The all-cause mortality among non-COVID-19 patients showed only a minimal increase (+7.5%) during the lockdown  
329 period. The significant increase in mortality for cardiovascular and endocrine systems' diseases that we have registered  
330 during lockdown is in line with other studies [24-26, 29].

331 The key finding of our study is that, with the sudden drop of ED visits and hospitalizations, we found a statistically  
332 significant increase of out-of-hospital all-cause mortality, mainly driven by an increase in deaths for neoplasms,  
333 cardiovascular diseases and endocrine, nutritional and metabolic diseases. In-hospital mortality instead showed an  
334 opposite and decreasing trend, due to the reduction of non-COVID-19 patients in healthcare facilities. We assume that  
335 these data are attributable to a delay in seeking hospital care and to system's inability in providing the same standards  
336 of care during a public health emergency, both in terms of quality and quantity. Our findings confirm those reported by  
337 Walker, L.E et al [30]. related to a multi-hospital system, in which an increase of non-COVID-related overall mortality  
338 was found to be mainly driven by out-of-hospital deaths, due to patients deferring care.

339 During the pre-lockdown weeks, we observed a significant increase in mortality for mental diseases. This might be due  
340 to the sense of fear and anxiety which reigned during the pre-lockdown period, with a consequent exacerbation of  
341 mental disorders [31, 32]. The reduction in overall mortality for neoplasms during the post-lockdown weeks, when  
342 considered together with the increased out-of-hospital mortality for the same cause recorded in the lockdown period,  
343 likely needs to be analyzed when medium- and long-term data will be available.

344 These data suggest that all-cause and cause-specific out-of-hospital mortality might be considered a useful indicator for  
345 targeting the consequences of the pandemic on non-COVID-19 patients.

346

### 347 **Limitations**

348 This study has some limitations. First, mortality data might include under-diagnosed COVID-19 cases. In fact the type  
349 of access and causes of death could have been coded incorrectly. However this is unavoidable due to the case definition  
350 and the context of that time-period, when the pandemic disruptively changed routine practice. Furthermore, considering  
351 the delayed onset of the pandemic in BMA and the preparedness efforts of local healthcare authorities, compared to  
352 other Italian areas earlier affected, we assume that no significant underestimation of COVID-19 deaths occurred, and  
353 that just a minority of COVID-19 deaths occurred out of the hospital, given that the vast majority of severely  
354 symptomatic COVID-19 patients had been hospitalized.

355 Furthermore, we had access to cause-specific mortality data, but only aggregated into broad categories (e.g. death for  
356 cardiovascular diseases, death for injury or poisoning, etc.). Data on more specific causes of death are still not available  
357 and therefore no conclusions can be drawn on more specific causes of death.

358 Finally, the short time window of the post-lockdown period considered in this study does not allow us to generalize our  
359 findings regarding possible medium and long term effects of the pandemic. Additional data are necessary to understand  
360 the effects of diagnostic and therapeutic delays that the pandemic has inevitably entailed, both for chronic and for acute  
361 patients.

362

### 363 **Conclusions**

364 In summary, our analysis showed a clear reduction of ED visits and hospitalizations for non-COVID-19 patients during  
365 the first months of the pandemic in a wide and populated area, and a significant increase in non-COVID-19 out-of-  
366 hospital deaths. Out-of-hospital mortality due to neoplasms, cardiovascular and endocrine systems' diseases showed a  
367 significant increase during the lockdown weeks, while for other conditions the consequences of the pandemic on non-  
368 COVID-19 patients are still unknown.

369 During the first COVID-19 wave, the reduction in ED visits and hospitalization probably eased the healthcare system in

370 facing an unprecedented emergency. In view of the recurrence of the crisis, the scenario described by our study  
371 represents a teachable moment about population and healthcare systems' response at the early stages of the pandemic in  
372 terms of reduced demand of care and systems' capability in intercepting it. According to our findings, we also advocate  
373 the need for further investigations into the medium and long term effects of the pandemic on non-COVID-19 patients,  
374 in order to strengthen population awareness and systems' preparedness.

375

376

### 377 **References**

- 378 1. Odone A, Delmonte D, Scognamiglio T, et al. (2020) COVID-19 deaths in Lombardy, Italy: data in context *Lancet*  
379 *Public Health*. 5(6):e310. doi:10.1016/S2468-2667(20)30099-2
- 380 2. Gibertoni D, Kadjo YCA, Golinelli D, et al. (2020) Patterns of COVID-19 related excess mortality in the  
381 municipalities of Northern Italy 2020.05.11.20097964; doi: <https://doi.org/10.1101/2020.05.11.20097964>
- 382 3. Lavezzo E, Franchin E, Ciavarella C, et al. (2020) Suppression of a SARS-CoV-2 outbreak in the Italian municipality  
383 of Vo'. *Nature*. 584(7821):425-429. doi:10.1038/s41586-020-2488-1
- 384 4. Italian Civil Protection Department (2020) COVID-19: Situazione Italia.  
385 <https://opendatadpc.maps.arcgis.com/apps/opsdashboard/index.html#/b0c68bce2cce478eaac82fe38d4138b1>. Accessed  
386 14 October 2020.
- 387 5. Wang D, Hu B, Hu C, et al. (2020) Clinical Characteristics of 138 Hospitalized Patients With 2019 Novel  
388 Coronavirus-Infected Pneumonia in Wuhan, China. *JAMA*. 323(11):1061-1069. doi:10.1001/jama.2020.1585
- 389 6. Jeffery MM, D'Onofrio G, Paek H, et al. (2020) Trends in Emergency Department Visits and Hospital Admissions in  
390 Health Care Systems in 5 States in the First Months of the COVID-19 Pandemic in the US. *JAMA Intern Med*.  
391 180(10):1328-1333. doi:10.1001/jamainternmed.2020.3288
- 392 7. Rosenbaum L. (2020) The Untold Toll - The Pandemic's Effects on Patients without Covid-19. *N Engl J Med*.  
393 382(24):2368-2371. doi:10.1056/NEJMms2009984
- 394 8. Emilia-Romagna Region Statistics Office [online] (2020) [https://statistica.regione.emilia-romagna.it/servizi-](https://statistica.regione.emilia-romagna.it/servizi-online/statistica-self-service/popolazione/popolazione-residente-dal-1861)  
395 [online/statistica-self-service/popolazione/popolazione-residente-dal-1861](https://statistica-regione-emilia-romagna.it/servizi-online/statistica-self-service/popolazione/popolazione-residente-dal-1861). Accessed 14 October 2020

- 396 9. Kim HJ, Fay MP, Feuer EJ, et al. (2000) Permutation tests for joinpoint regression with applications to cancer rates.  
397 Stat Med. 19(3):335-351. doi:10.1002/(sici)1097-0258(20000215)19:3<335::aid-sim336>3.0.co;2-z
- 398 10. Van Damme W, Dahake R, Delamou A, et al. (2020) The COVID-19 pandemic: diverse contexts; different  
399 epidemics-how and why?. BMJ Glob Health. 5(7):e003098. doi:10.1136/bmjgh-2020-003098
- 400 11. Tartari F, Guglielmo A, Fuligni F, et al. (2020) Changes in emergency service access after spread of COVID-19  
401 across Italy. J Eur Acad Dermatol Venereol. 34(8):e350-e351. doi:10.1111/jdv.16553
- 402 12. Baum A, Schwartz MD (2020) Admissions to Veterans Affairs Hospitals for Emergency Conditions During the  
403 COVID-19 Pandemic. JAMA. 324(1):96-99. doi:10.1001/jama.2020.9972
- 404 13. Lazzarini M, Barbi E, Apicella A, et al. (2020) Delayed access or provision of care in Italy resulting from fear of  
405 COVID-19. Lancet Child Adolesc Health. 4(5):e10-e11. doi:10.1016/S2352-4642(20)30108-5
- 406 14. Ferrero F, Ossorio MF, Torres FA, et al. (2020) Impact of the COVID-19 pandemic in the paediatric emergency  
407 department attendances in Argentina. Arch Dis Child. archdischild-2020-319833. doi:10.1136/archdischild-2020-  
408 319833
- 409 15. Schwarz V, Mahfoud F, Lauder L, et al. (2020) Decline of emergency admissions for cardiovascular and  
410 cerebrovascular events after the outbreak of COVID-19. Clin Res Cardiol. 1-7. doi:10.1007/s00392-020-01688-9
- 411 16. Weber EJ, Hirst E, Marsh M. (2017) The patient's dilemma: attending the emergency department with a minor  
412 illness. BMJ. 357:j1941. doi:10.1136/bmj.j1941
- 413 17. Buonanno P, Galletta S, Puca M. (2020) Estimating the severity of COVID-19: Evidence from the Italian epicenter.  
414 PLoS One. 15(10):e0239569. Published 2020 Oct 1. doi:10.1371/journal.pone.0239569
- 415 18. Blangiardo M, Cameletti M, Pirani M, et al. (2020) Estimating weekly excess mortality at sub-national level in Italy  
416 during the COVID-19 pandemic. PLoS One. 15(10):e0240286. doi:10.1371/journal.pone.0240286
- 417 19. Mafham MM, Spata E, Goldacre R, et al. (2020) COVID-19 pandemic and admission rates for and management of  
418 acute coronary syndromes in England. Lancet. 396(10248):381-389. doi:10.1016/S0140-6736(20)31356-8
- 419 20. Kraaijevanger N, van Leeuwen H, Rijpsma D, et al. (2016) Motives for self-referral to the emergency department: a  
420 systematic review of the literature. BMC Health Serv Res. 16(1):685. Published 2016 Dec 9. doi:10.1186/s12913-016-  
421 1935-z
- 422 21. Westgard BC, Morgan MW, Vazquez-Benitez G, et al. (2020) An Analysis of Changes in Emergency Department  
423 Visits After a State Declaration During the Time of COVID-19. Ann Emerg Med. 76(5):595-601.  
424 doi:10.1016/j.annemergmed.2020.06.019

- 425 22 . Sancton K, Sloss L, Berkowitz J, et al. (2018) Low-acuity presentations to the emergency department: Reasons for  
426 and access to other health care providers before presentation. *Can Fam Physician*. 64(8):e354-e360.
- 427 23. Chaiyachati K, Kangovi S. (2020) Inappropriate ED visits: patient responsibility or an attribution bias?. *BMJ Qual*  
428 *Saf*. 29(6):441-442. doi:10.1136/bmjqs-2019-009729
- 429 24. De Filippo O, D'Ascenzo F, Angelini F, et al. (2020) Reduced Rate of Hospital Admissions for ACS during Covid-  
430 19 Outbreak in Northern Italy. *N Engl J Med*. 383(1):88-89. doi:10.1056/NEJMc2009166
- 431 25. Solomon MD, McNulty EJ, Rana JS, et al. (2020) The Covid-19 Pandemic and the Incidence of Acute Myocardial  
432 Infarction. *N Engl J Med*. 383(7):691-693. doi:10.1056/NEJMc2015630
- 433 26. Wu J, Mamas MA, Mohamed MO, et al. (2020) Place and causes of acute cardiovascular mortality during the  
434 COVID-19 pandemic. *Heart*. heartjnl-2020-317912. doi:10.1136/heartjnl-2020-317912
- 435 27. Golinelli D, Toscano F, Bucci A, et al. (2017) Health Expenditure and All-Cause Mortality in the 'Galaxy' of Italian  
436 Regional Healthcare Systems: A 15-Year Panel Data Analysis. *Appl Health Econ Health Policy*. 15(6):773-783.  
437 doi:10.1007/s40258-017-0342-x
- 438 28. Brown LD. (2003) Comparing health systems in four countries: lessons for the United States. *Am J Public Health*.  
439 93(1):52-56. doi:10.2105/ajph.93.1.52
- 440 29. Baldi E, Sechi GM, Mare C, et al. (2020) Out-of-Hospital Cardiac Arrest during the Covid-19 Outbreak in Italy. *N*  
441 *Engl J Med*. 383(5):496-498. doi:10.1056/NEJMc2010418
- 442 30. Walker, L.E. et al. (2020) Impact of the SARS-CoV-2 Pandemic on Emergency Department Presentations in an  
443 Integrated Health System, *Annals of Emergency Medicine*. 76 (4), S2 - S3. doi:10.1016/j.annemergmed.2020.09.014
- 444 31. Hoyer C, Ebert A, Szabo K, et al. (2020) Decreased utilization of mental health emergency service during the  
445 COVID-19 pandemic. *Eur Arch Psychiatry Clin Neurosci*. 1-3. doi:10.1007/s00406-020-01151-w
- 446 32. Moreno C, Wykes T, Galderisi S, et al. (2020) How mental health care should change as a consequence of the  
447 COVID-19 pandemic. *Lancet Psychiatry*. 7(9):813-824. doi:10.1016/S2215-0366(20)30307-2
